# Supplementary material for: High-performance biosensors based on angular plasmonic of a multilayer design: new materials for enhancing sensitivity of one-dimensional designs
Source: Royal Society of Chemistry journal article supplement (doi:10.1039/d3ra08731j), 2024-01-01
Supplement: d3ra08731j1.pdf [file d3ra08731j1.pdf]

## **High-Performance Biosensor Based on Angular Plasmonic of a Multilayer Design: New Materials for Enhancing Sensitivity of One-dimensional Designs**

Hussein A. Elsayed<sup>1,2</sup>, Suneet Kumar Awasthi<sup>3</sup>, Abdulkarem H. M. Almagani<sup>4</sup>, Ahmed Mehaney<sup>2,\*</sup>, Yahya Ali Abdelrahman Ali<sup>5</sup>, Ahmad Alzahrani<sup>4,6</sup>, and Ashour M. Ahmed<sup>2,7</sup>

<sup>1</sup>*Department of Physics, College of Science, University of Ha'il, Ha'il P.O. Box 2440, Saudi Arabia*

<sup>2</sup>*Physics Department, Faculty of Science, Beni-Suef University, Beni-Suef, 62512, Egypt*

<sup>3</sup>*Department of Physics and Material Science and Engineering, Jaypee Institute of Information Technology, Noida 201304, U.P., India*

<sup>4</sup>*Electrical Engineering Department, College of Engineering, Najran University, Najran, Kingdom of Saudi Arabia*

<sup>5</sup>*Information Systems Department, College of Computer Sciences and Information Systems, Najran University, Najran, Saudi Arabia*

<sup>6</sup>*Scientific and Engineering Research Centre, Deanship of Scientific Research, Najran University, Najran, Saudi Arabia*

<sup>7</sup>*Physics Department, College of Science, Imam Mohammad Ibn Saud Islamic University (IMSIU), Riyadh 11623, Saudi Arabia*

\*Corresponding Authors E-mails: [ahmed011236@science.bsu.edu.eg](mailto:ahmed011236@science.bsu.edu.eg)

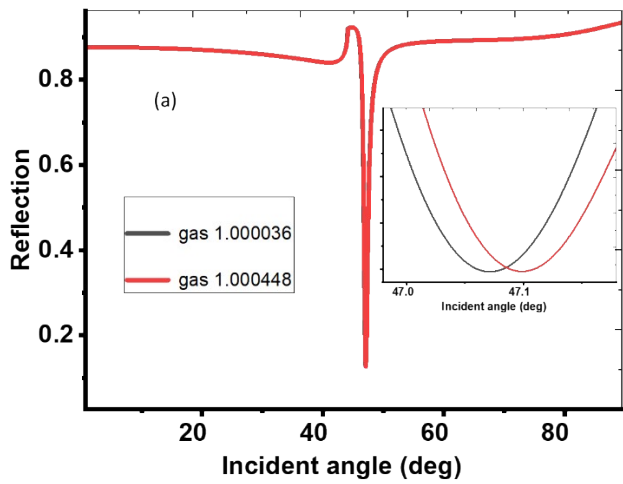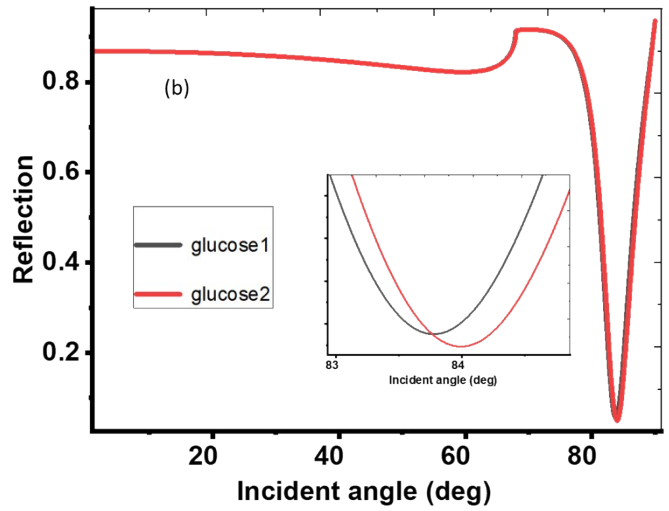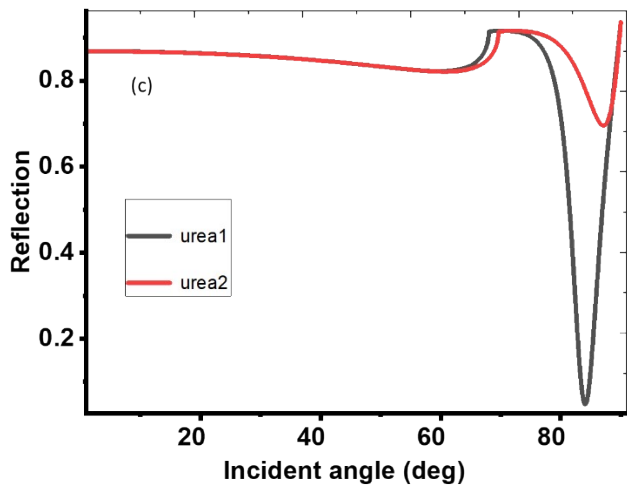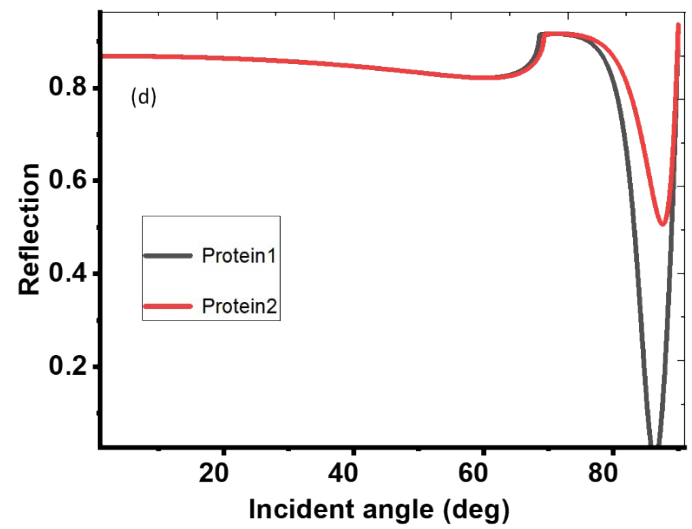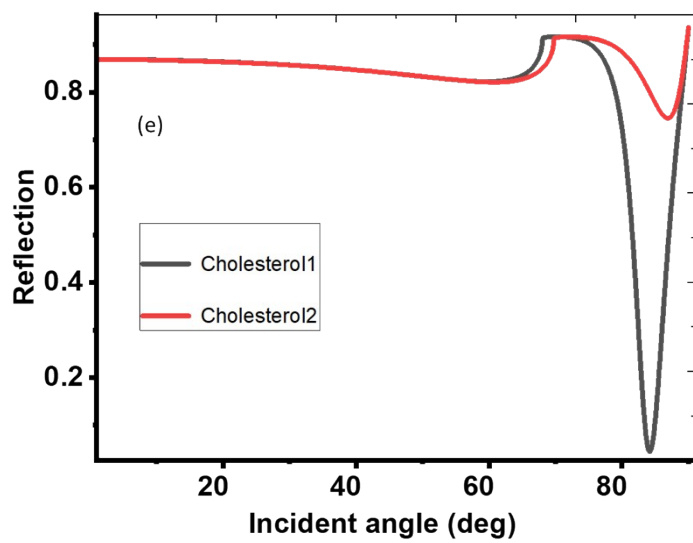

Figure S1: The selectivity and resonance dip of our designed structure for different biomolecules and gas molecules.
