# Supplementary material for: High-performance biosensors based on angular plasmonic of a multilayer design: new materials for enhancing sensitivity of one-dimensional designs
Source: Royal Society of Chemistry journal article supplement (doi:10.1039/d3ra08731j), 2024-01-01
Supplement: d3ra08731j2.pdf [file d3ra08731j2.pdf]

## A Table of contents entry

**Angular surface plasmon resonance sensor:** The suggested design of High-Performance Biosensor Based on Angular Plasmonic of a Multilayer Design

**Hussein A. Elsayed<sup>1, 2</sup>, Suneet Kumar Awasthi<sup>3</sup>, Abdulkarem H. M. Almawgani<sup>4</sup>, Ahmed Mehaney<sup>2, \*</sup>, Yahya Ali Abdelrahman Ali<sup>5</sup>, Ahmad Alzahrani<sup>4, 6</sup>, and Ashour M. Ahmed<sup>2, 7</sup>**

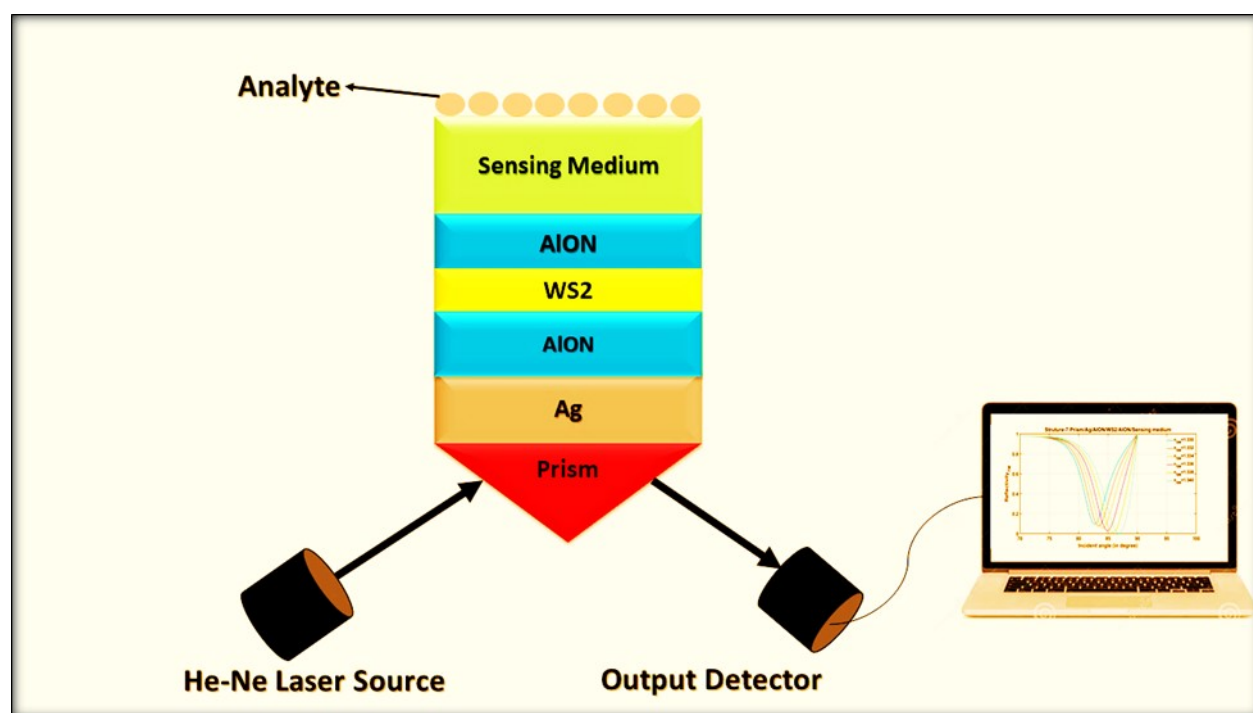

Fig. S1. A systematic view of optimized Structure-7 composed of Ohara S-FPL53 prism/Ag/AlON/WS<sub>2</sub>/AlON/Sensing medium.

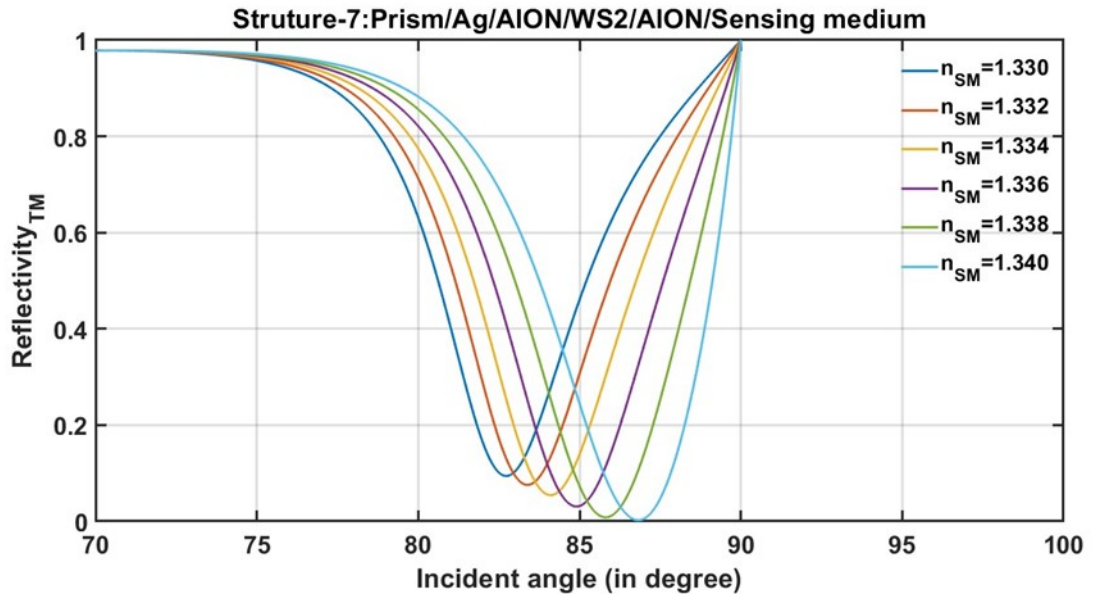

Fig. S2. The incident angle dependent reflectivity of optimized Structure-7 that is composed of Prism/Ag/AION/WS<sub>2</sub>/AION/Sensing medium loaded separately with the analytes of refractive indices 1.330, 1.332, 1.334, 1.336, 1.338, and 1.340.

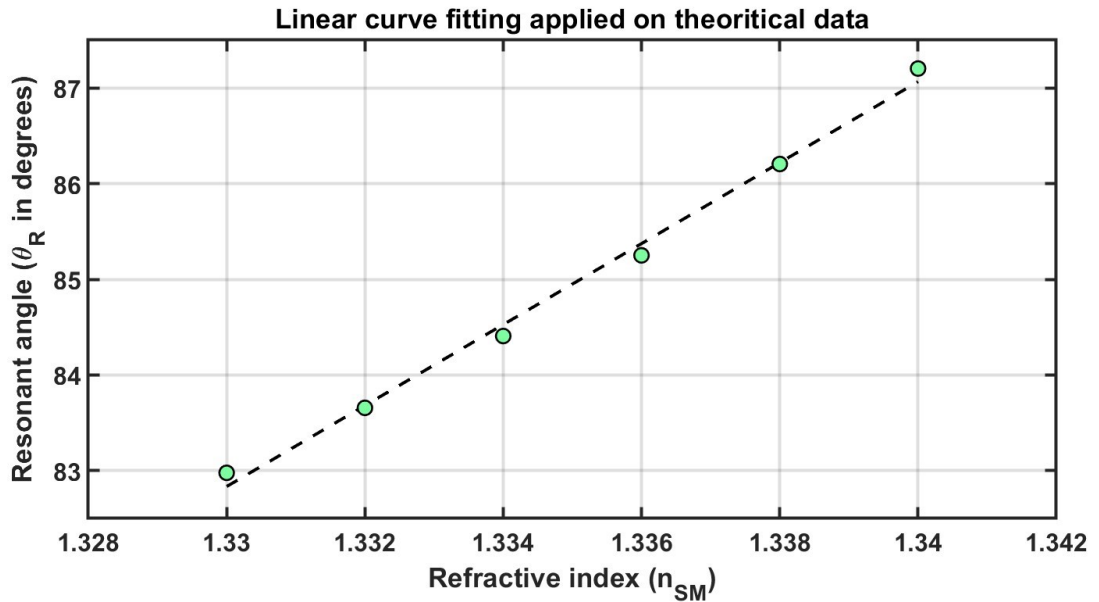

Fig. S3. Linear curve fitting shown by dashed black color line and green color solid balls, showing refractive index dependent resonant angle values.
